# Supplementary material for: The role of fragmentation and landscape changes in the ecological release of common nest predators in the Neotropics
Source: PeerJ. 2014 Jul 1;2:e464. doi: 10.7717/peerj.464 (PMC4103071; doi:10.7717/peerj.464)
Supplement: Supplemental Information 1 [file peerj-02-464-s001.xlsx]

## Sheet: Condensed Detection Histories a
Occupancy and data for nest predators in the San Juan - La Selva Biological Corridor, with standardized covariates
Species	Site	1	2	3	4	5	6	7	d_n	sp1	sp2	sp3	dist_z	cattle	pina	conn_z	for_z	Maq	tnp_z
Tayra	Laguna	0	0	0	0	0	0	0	1	1	0	0	0.345144	0	0	0.688299	1.16661	1	-0.276591
Tayra	Pedacito	0	0	0	0	0	0	0	1	1	0	0	0.263059	0	0	0.688299	0.506218	1	-0.175387
Tayra	Maquenque	0	0	1	0	0	1	0	1	1	0	0	0.7711	0	0	0.232195	-0.167283	1	2.05111
Tayra	Pangola I	0	0	0	0	0	0	0	1	1	0	0	-0.946786	0	1	0.688299	0.525291	0	-0.479
Tayra	Pangola II	1	1	0	1	1	1	0	1	1	0	0	2.07414	0	1	0.688299	0.363571	0	0.735452
Tayra	San Carlos	0	0	0	0	0	.	.	1	1	0	0	-0.180841	1	0	0.232195	1.08674	1	-0.782613
Tayra	Ochoa I	0	0	0	0	0	.	.	1	1	0	0	1.28276	1	0	0.688299	-0.45814	1	-1.28863
Tayra	Ochoa II	0	0	0	0	0	.	.	1	1	0	0	0.270424	1	0	0.688299	0.948067	1	-1.18743
Tayra	El Eden	1	1	0	0	0	0	0	1	1	0	0	-0.539844	1	1	-1.61388	-1.36647	0	-0.0741828
Tayra	No Name	0	0	0	0	0	0	1	1	1	0	0	-0.715931	0	1	-1.62052	-2.00977	0	-0.377796
Tayra	Querbrada Grande	0	1	0	1	0	1	.	1	1	0	0	-1.21473	0	1	-1.11386	-0.832439	0	0.735452
Tayra	Santa Elena	0	1	1	0	0	0	.	1	1	0	0	-1.81383	0	1	-1.62224	-1.34541	0	1.14027
Tayra	Raphael Monge	0	0	0	0	0	0	0	1	1	0	0	0.36282	1	0	0.688299	0.733103	1	-0.175387
Tayra	Finca Chacon	0	1	0	0	0	0	0	1	1	0	0	0.552833	1	0	3	0.84277	0	-1.18743
Tayra	Golfito1	0	0	0	0	0	0	0	1	1	0	0	-0.510384	1	0	0.688299	0.00715222	0	1.34268
Coati	Laguna	0	1	1	1	0	0	0	1	0	1	0	0.345144	0	0	0.688299	1.16661	1	-0.276591
Coati	Pedacito	1	0	0	0	0	0	0	1	0	1	0	0.263059	0	0	0.688299	0.506218	1	-0.175387
Coati	Maquenque	0	1	1	0	0	1	0	1	0	1	0	0.7711	0	0	0.232195	-0.167283	1	2.05111
Coati	Pangola I	0	1	0	1	0	0	0	1	0	1	0	-0.946786	0	1	0.688299	0.525291	0	-0.479
Coati	Pangola II	1	1	0	0	0	0	0	1	0	1	0	2.07414	0	1	0.688299	0.363571	0	0.735452
Coati	San Carlos	0	0	1	1	0	.	.	1	0	1	0	-0.180841	1	0	0.232195	1.08674	1	-0.782613
Coati	Ochoa I	0	0	0	0	0	.	.	1	0	1	0	1.28276	1	0	0.688299	-0.45814	1	-1.28863
Coati	Ochoa II	0	0	0	0	0	.	.	1	0	1	0	0.270424	1	0	0.688299	0.948067	1	-1.18743
Coati	El Eden	1	1	1	1	1	1	1	1	0	1	0	-0.539844	1	1	-1.61388	-1.36647	0	-0.0741828
Coati	No Name	0	0	0	0	0	0	0	1	0	1	0	-0.715931	0	1	-1.62052	-2.00977	0	-0.377796
Coati	Querbrada Grande	0	0	0	0	0	0	.	1	0	1	0	-1.21473	0	1	-1.11386	-0.832439	0	0.735452
Coati	Santa Elena	1	0	1	0	1	0	.	1	0	1	0	-1.81383	0	1	-1.62224	-1.34541	0	1.14027
Coati	Raphael Monge	0	1	0	1	0	0	1	1	0	1	0	0.36282	1	0	0.688299	0.733103	1	-0.175387
Coati	Finca Chacon	0	0	0	0	0	0	0	1	0	1	0	0.552833	1	0	3	0.84277	0	-1.18743
Coati	Golfito1	0	0	0	0	0	0	0	1	0	1	0	-0.510384	1	0	0.688299	0.00715222	0	1.34268
Raccoon	Laguna	0	0	0	0	0	0	0	0	0	0	1	0.345144	0	0	0.688299	1.16661	1	-0.276591
Raccoon	Pedacito	0	0	0	0	0	0	0	0	0	0	1	0.263059	0	0	0.688299	0.506218	1	-0.175387
Raccoon	Maquenque	1	1	1	0	0	0	0	0	0	0	1	0.7711	0	0	0.232195	-0.167283	1	2.05111
Raccoon	Pangola I	0	0	0	0	0	0	0	0	0	0	1	-0.946786	0	1	0.688299	0.525291	0	-0.479
Raccoon	Pangola II	0	0	0	0	0	0	0	0	0	0	1	2.07414	0	1	0.688299	0.363571	0	0.735452
Raccoon	San Carlos	0	0	0	0	0	.	.	0	0	0	1	-0.180841	1	0	0.232195	1.08674	1	-0.782613
Raccoon	Ochoa I	0	0	0	0	0	.	.	0	0	0	1	1.28276	1	0	0.688299	-0.45814	1	-1.28863
Raccoon	Ochoa II	0	0	0	0	0	.	.	0	0	0	1	0.270424	1	0	0.688299	0.948067	1	-1.18743
Raccoon	El Eden	0	1	0	0	0	0	0	0	0	0	1	-0.539844	1	1	-1.61388	-1.36647	0	-0.0741828
Raccoon	No Name	1	0	1	0	0	0	0	0	0	0	1	-0.715931	0	1	-1.62052	-2.00977	0	-0.377796
Raccoon	Querbrada Grande	0	0	0	0	0	0	.	0	0	0	1	-1.21473	0	1	-1.11386	-0.832439	0	0.735452
Raccoon	Santa Elena	0	0	0	0	0	0	.	0	0	0	1	-1.81383	0	1	-1.62224	-1.34541	0	1.14027
Raccoon	Raphael Monge	0	0	0	0	0	0	0	0	0	0	1	0.36282	1	0	0.688299	0.733103	1	-0.175387
Raccoon	Finca Chacon	0	0	0	0	0	0	0	0	0	0	1	0.552833	1	0	3	0.84277	0	-1.18743
Raccoon	Golfito1	0	0	0	0	0	0	0	0	0	0	1	-0.510384	1	0	0.688299	0.00715222	0	1.34268
Opossum	Laguna	0	0	0	0	0	0	0	0	0	0	0	0.345144	0	0	0.688299	1.16661	1	-0.276591
Opossum	Pedacito	0	0	0	1	0	0	0	0	0	0	0	0.263059	0	0	0.688299	0.506218	1	-0.175387
Opossum	Maquenque	0	0	1	1	1	0	0	0	0	0	0	0.7711	0	0	0.232195	-0.167283	1	2.05111
Opossum	Pangola I	1	0	0	1	0	0	0	0	0	0	0	-0.946786	0	1	0.688299	0.525291	0	-0.479
Opossum	Pangola II	0	0	0	0	0	0	0	0	0	0	0	2.07414	0	1	0.688299	0.363571	0	0.735452
Opossum	San Carlos	0	0	0	0	0	.	.	0	0	0	0	-0.180841	1	0	0.232195	1.08674	1	-0.782613
Opossum	Ochoa I	1	0	0	1	0	.	.	0	0	0	0	1.28276	1	0	0.688299	-0.45814	1	-1.28863
Opossum	Ochoa II	1	1	1	1	1	.	.	0	0	0	0	0.270424	1	0	0.688299	0.948067	1	-1.18743
Opossum	El Eden	0	0	0	0	0	0	0	0	0	0	0	-0.539844	1	1	-1.61388	-1.36647	0	-0.0741828
Opossum	No Name	0	0	0	1	1	0	0	0	0	0	0	-0.715931	0	1	-1.62052	-2.00977	0	-0.377796
Opossum	Querbrada Grande	1	1	1	0	0	0	.	0	0	0	0	-1.21473	0	1	-1.11386	-0.832439	0	0.735452
Opossum	Santa Elena	0	0	0	0	0	0	.	0	0	0	0	-1.81383	0	1	-1.62224	-1.34541	0	1.14027
Opossum	Raphael Monge	0	0	0	0	0	0	0	0	0	0	0	0.36282	1	0	0.688299	0.733103	1	-0.175387
Opossum	Finca Chacon	0	0	0	0	1	0	0	0	0	0	0	0.552833	1	0	3	0.84277	0	-1.18743
Opossum	Golfito1	0	0	0	0	0	0	0	0	0	0	0	-0.510384	1	0	0.688299	0.00715222	0	1.34268

## Sheet: Tayra1
Tayra Occupancy
Site	1	2	3	4	5	6	7	8	9	10	11	12	13	14	15	16	17	18	19	20	21	22	23	24	25	26	27	28	29	30	31	32	33	34	35	36
Laguna	0	0	0	0	0	0	0	0	0	0	0	0	0	0	0	0	0	0	0	0	0	0	0	0	0	0	0	0	0	0	0	0	0	.	.	.	0
Pedacito	0	0	0	0	0	0	0	0	0	0	0	0	0	0	0	0	0	0	0	0	0	0	0	0	0	0	0	0	0	0	0	0	.	.	.	.	0
Maquenque	0	0	0	0	0	0	0	0	0	0	1	0	0	0	0	0	0	0	0	0	0	0	0	0	0	0	0	0	1	0	0	0	.	.	.	.	2
Pangola I	0	0	0	0	0	0	0	0	0	0	0	0	0	0	0	0	0	0	0	0	0	0	0	0	0	0	0	0	0	0	.	.	.	.	.	.	0
Pangola II	0	0	1	0	0	1	1	0	0	0	0	0	0	0	0	1	0	1	1	0	1	0	1	1	0	0	0	0	1	0	0	0	.	.	.	.	10
San Carlos	0	0	0	0	0	0	0	0	0	0	0	0	0	0	0	0	0	0	0	0	0	0	0	0	0	0	.	.	.	.	.	.	.	.	.	.	0
Ochoa I	0	0	0	0	0	0	0	0	0	0	0	0	0	0	0	0	0	0	0	0	0	0	0	0	.	.	.	.	.	.	.	.	.	.	.	.	0
Ochoa II	0	0	0	0	0	0	0	0	0	0	0	0	0	0	0	0	0	0	0	0	0	0	0	0	.	.	.	.	.	.	.	.	.	.	.	.	0
El Eden	0	0	0	0	1	0	0	0	1	0	0	0	0	0	0	0	0	0	0	0	0	0	0	0	0	0	0	0	0	0	0	0	0	0	0	0	2
No Name	0	0	0	0	0	0	0	0	0	0	0	0	0	0	0	0	0	0	0	0	0	0	0	0	0	0	0	0	0	0	0	0	0	0	0	1	1
Querbrada Grande	0	0	0	0	0	0	0	0	1	0	0	0	0	0	0	0	1	0	0	0	0	0	0	0	0	1	.	.	.	.	.	.	.	.	.	.	3
Santa Elena	0	0	0	0	0	1	0	1	0	0	0	0	1	0	0	0	0	0	0	0	0	0	0	0	0	0	0	0	0	.	.	.	.	.	.	.	3
Raphael Monge	0	0	0	0	0	0	0	0	0	0	0	0	0	0	0	0	0	0	0	0	0	0	0	0	0	0	0	0	0	0	0	0	0	0	.	.	0
Finca Chacon	0	0	0	0	0	0	1	0	0	0	0	0	0	0	0	0	0	0	0	0	0	0	0	0	0	0	0	0	0	0	0	.	.	.	.	.	1
Golfito1	0	0	0	0	0	0	0	0	0	0	0	0	0	0	0	0	0	0	0	0	0	0	0	0	0	0	0	0	0	0	0	0	0	.	.	.	0
Golfito2	0	0	0	0	0	0	0	0	0	0	0	0	0	0	0	0	0	0	0	0	0	0	0	0	0	1	0	0	0	0	0	0	0	.	.	.	1
Totals	0	0	1	0	1	2	2	1	2	0	1	0	1	0	0	1	1	1	1	0	1	0	1	1	0	2	0	0	2	0	0	0	0	0	0	1	23
Totals	0	0	1	0	1	1	1	1	1	0	1	0	1	0	0	1	1	1	1	0	1	0	1	1	0	1	0	0	1	0	0	0	0	0	0	1

## Sheet: Coati1
Coati Occupancy
Site	1	2	3	4	5	6	7	8	9	10	11	12	13	14	15	16	17	18	19	20	21	22	23	24	25	26	27	28	29	30	31	32	33	34	35	36
Laguna	0	0	0	0	0	0	0	0	0	1	1	0	0	0	0	0	1	0	0	0	0	0	0	0	0	0	0	0	0	0	0	0	0	.	.	.	3
Pedacito	0	1	0	0	0	0	0	0	0	0	0	0	0	0	0	0	0	0	0	0	0	0	0	0	0	0	0	0	0	0	0	0	.	.	.	.	1
Maquenque	0	0	0	0	0	0	1	1	1	0	1	0	0	0	0	0	0	0	0	0	0	0	0	0	0	0	0	1	0	0	0	0	.	.	.	.	5
Pangola I	0	0	0	0	0	0	0	0	1	0	0	0	0	0	0	0	0	0	1	0	0	0	0	0	0	0	0	0	0	0	.	.	.	.	.	.	2
Pangola II	0	0	0	1	0	1	0	0	0	0	0	0	0	0	0	0	0	0	0	0	0	0	0	0	0	0	0	0	0	0	0	0	.	.	.	.	2
San Carlos	0	0	0	0	0	0	0	0	0	0	0	1	0	0	0	0	0	0	0	1	0	0	0	0	0	0	.	.	.	.	.	.	.	.	.	.	2
Ochoa I	0	0	0	0	0	0	0	0	0	0	0	0	0	0	0	0	0	0	0	0	0	0	0	0	.	.	.	.	.	.	.	.	.	.	.	.	0
Ochoa II	0	0	0	0	0	0	0	0	0	0	0	0	0	0	0	0	0	0	0	0	0	0	0	0	.	.	.	.	.	.	.	.	.	.	.	.	0
El Eden	0	0	1	1	0	1	0	0	1	0	0	1	0	0	1	1	0	0	0	0	1	0	0	0	1	0	0	0	0	1	0	1	0	0	0	0	11
No Name	0	0	0	0	0	0	0	0	0	0	0	0	0	0	0	0	0	0	0	0	0	0	0	0	0	0	0	0	0	0	0	0	0	0	0	0	0
Querbrada Grande	0	0	0	0	0	0	0	0	0	0	0	0	0	0	0	0	0	0	0	0	0	0	0	0	0	0	.	.	.	.	.	.	.	.	.	.	0
Santa Elena	0	0	0	1	0	0	0	0	0	0	1	0	0	0	0	0	0	0	0	0	0	1	0	0	1	0	0	0	0	.	.	.	.	.	.	.	4
Raphael Monge	0	0	0	0	0	1	0	0	0	0	0	0	0	0	0	0	1	0	0	0	0	0	0	0	0	0	0	0	0	0	0	0	0	1	.	.	3
Finca Chacon	0	0	0	0	0	0	0	0	0	0	0	0	0	0	0	0	0	0	0	0	0	0	0	0	0	0	0	0	0	0	0	.	.	.	.	.	0
Golfito1	0	0	0	0	0	0	0	0	0	0	0	0	0	0	0	0	0	0	0	0	0	0	0	0	0	0	0	0	0	0	0	0	0	.	.	.	0
Golfito2	0	0	0	0	0	0	0	0	0	0	0	0	0	0	0	0	0	0	0	0	0	0	0	0	0	0	0	0	0	0	0	0	0	.	.	.	0
Totals	0	1	1	3	0	3	1	1	3	1	3	2	0	0	1	1	2	0	1	1	1	1	0	0	2	0	0	1	0	1	0	1	0	1	0	0	33
Totals	0	1	1	1	0	1	1	1	1	1	1	1	0	0	1	1	1	0	1	1	1	1	0	0	1	0	0	1	0	1	0	1	0	1	0	0

## Sheet: Raccoon1
Raccoon Occupancy
Site	1	2	3	4	5	6	7	8	9	10	11	12	13	14	15	16	17	18	19	20	21	22	23	24	25	26	27	28	29	30	31	32	33	34	35	36
Laguna	0	0	0	0	0	0	0	0	0	0	0	0	0	0	0	0	0	0	0	0	0	0	0	0	0	0	0	0	0	0	0	0	0	.	.	.	0
Pedacito	0	0	0	0	0	0	0	0	0	0	0	0	0	0	0	0	0	0	0	0	0	0	0	0	0	0	0	0	0	0	0	0	.	.	.	.	0
Maquenque	0	0	1	0	0	0	1	0	0	1	0	0	0	0	1	0	0	0	0	0	0	0	0	0	0	0	0	0	0	0	0	0	.	.	.	.	4
Pangola I	0	0	0	0	0	0	0	0	0	0	0	0	0	0	0	0	0	0	0	0	0	0	0	0	0	0	0	0	0	0	.	.	.	.	.	.	0
Pangola II	0	0	0	0	0	0	0	0	0	0	0	0	0	0	0	0	0	0	0	0	0	0	0	0	0	0	0	0	0	0	0	0	.	.	.	.	0
San Carlos	0	0	0	0	0	0	0	0	0	0	0	0	0	0	0	0	0	0	0	0	0	0	0	0	0	0	.	.	.	.	.	.	.	.	.	.	0
Ochoa I	0	0	0	0	0	0	0	0	0	0	0	0	0	0	0	0	0	0	0	0	0	0	0	0	.	.	.	.	.	.	.	.	.	.	.	.	0
Ochoa II	0	0	0	0	0	0	0	0	0	0	0	0	0	0	0	0	0	0	0	0	0	0	0	0	.	.	.	.	.	.	.	.	.	.	.	.	0
El Eden	0	0	0	0	0	0	1	0	0	0	0	0	0	0	0	0	0	0	0	0	0	0	0	0	0	0	0	0	0	0	0	0	0	0	0	0	1
No Name	0	0	1	0	0	0	0	0	0	0	1	0	0	0	0	0	0	0	0	0	0	0	0	0	0	0	0	0	0	0	0	0	0	0	0	0	2
Querbrada Grande	0	0	0	0	0	0	0	0	0	0	0	0	0	0	0	0	0	0	0	0	0	0	0	0	0	0	.	.	.	.	.	.	.	.	.	.	0
Santa Elena	0	0	0	0	0	0	0	0	0	0	0	0	0	0	0	0	0	0	0	0	0	0	0	0	0	0	0	0	0	.	.	.	.	.	.	.	0
Raphael Monge	0	0	0	0	0	0	0	0	0	0	0	0	0	0	0	0	0	0	0	0	0	0	0	0	0	0	0	0	0	0	0	0	0	0	.	.	0
Finca Chacon	0	0	0	0	0	0	0	0	0	0	0	0	0	0	0	0	0	0	0	0	0	0	0	0	0	0	0	0	0	0	0	.	.	.	.	.	0
Golfito1	0	0	0	0	0	0	0	0	0	0	0	0	0	0	0	0	0	0	0	0	0	0	0	0	0	0	0	0	0	0	0	0	0	.	.	.	0
Golfito2	0	0	0	0	0	0	0	0	0	0	0	0	0	0	0	0	0	0	0	0	0	0	0	0	0	0	0	0	0	0	0	0	0	.	.	.	0
Totals	0	0	2	0	0	0	2	0	0	1	1	0	0	0	1	0	0	0	0	0	0	0	0	0	0	0	0	0	0	0	0	0	0	0	0	0	7
Totals	0	0	1	0	0	0	1	0	0	1	1	0	0	0	1	0	0	0	0	0	0	0	0	0	0	0	0	0	0	0	0	0	0	0	0	0

## Sheet: Opossums
Opossums
Site	1	2	3	4	5	6	7	8	9	10	11	12	13	14	15	16	17	18	19	20	21	22	23	24	25	26	27	28	29	30	31	32	33	34	35	36
Laguna	0	0	0	0	0	0	0	0	0	0	0	0	0	0	0	0	0	0	0	0	0	0	0	0	0	0	0	0	0	0	0	0	0	.	.	.	0
Pedacito	0	0	0	0	0	0	0	0	0	0	0	0	0	0	0	0	0	0	1	0	0	0	0	0	0	0	0	0	0	0	0	0	.	.	.	.	1
Maquenque	0	0	0	0	0	0	0	0	0	0	0	1	0	0	0	0	0	0	0	1	0	1	0	0	0	0	0	0	0	0	0	0	.	.	.	.	3
Pangola I	0	0	1	0	0	0	0	0	0	0	0	0	0	0	0	0	1	0	0	0	0	0	0	0	0	0	0	0	0	0	.	.	.	.	.	.	2
Pangola II	0	0	0	0	0	0	0	0	0	0	0	0	0	0	0	0	0	0	0	0	0	0	0	0	0	0	0	0	0	0	0	0	.	.	.	.	0
San Carlos	0	0	0	0	0	0	0	0	0	0	0	0	0	0	0	0	0	0	0	0	0	0	0	0	0	0	.	.	.	.	.	.	.	.	.	.	0
Ochoa I	0	1	0	0	0	0	0	0	0	0	0	0	0	0	0	0	0	1	0	0	0	0	0	0	.	.	.	.	.	.	.	.	.	.	.	.	2
Ochoa II	1	1	0	0	1	0	1	0	0	1	0	0	0	1	0	0	1	0	0	0	1	0	0	0	.	.	.	.	.	.	.	.	.	.	.	.	8
El Eden	0	0	0	0	0	0	0	0	0	0	0	0	0	0	0	0	0	0	0	0	0	0	0	0	0	0	0	0	0	0	0	0	0	0	0	0	0
No Name	0	0	0	0	0	0	0	0	0	0	0	0	0	0	0	1	0	0	0	0	0	0	0	1	0	0	0	0	0	0	0	0	0	0	0	0	2
Querbrada Grande	1	0	1	0	0	1	0	0	0	0	0	0	0	1	0	0	0	0	0	0	0	0	0	0	0	0	.	.	.	.	.	.	.	.	.	.	4
Santa Elena	0	0	0	0	0	0	0	0	0	0	0	0	0	0	0	0	0	0	0	0	0	0	0	0	0	0	0	0	0	.	.	.	.	.	.	.	0
Raphael Monge	0	0	0	0	0	0	0	0	0	0	0	0	0	0	0	0	0	0	0	0	0	0	0	0	0	0	0	0	0	0	0	0	0	0	.	.	0
Finca Chacon	0	0	0	0	0	0	0	0	0	0	0	0	0	0	0	0	0	0	0	0	0	0	1	0	0	0	0	0	0	0	0	.	.	.	.	.	1
Golfito1	0	0	0	0	0	0	0	0	0	0	0	0	0	0	0	0	0	0	0	0	0	0	0	0	0	0	0	0	0	0	0	0	0	.	.	.	0
Golfito2	0	0	0	0	0	0	0	0	0	0	0	0	0	0	0	0	0	0	0	0	0	0	0	0	0	0	0	0	0	0	0	0	0	.	.	.	0
Totals	2	2	2	0	1	1	1	0	0	1	0	1	0	2	0	1	2	1	1	1	1	1	1	1	0	0	0	0	0	0	0	0	0	0	0	0	23
Totals	1	1	1	0	1	1	1	0	0	1	0	1	0	1	0	1	1	1	1	1	1	1	1	1	0	0	0	0	0	0	0	0	0	0	0	0

## Sheet: Site_covariates
Appendix C. Site information from camera trap surveys in the San Juan - La Selva Biological Corridor, Costa Rica, 2009-2010.
Site	Latitude	Longitude	Dist (km)	Maq	Water (m)	Pina	Conn (ha)	For (%)	Tnp	Trail (km)
Laguna del Lagarto	10.6861	-84.1806	2.9278	1	566	0	35119.7	98.18	14	4.8
Pedacito del Cielo	10.7109	-84.1769	2.8665	1	536	0	35119.7	81.56	15	4.2
Maquenque Lodge	10.6821	-84.2052	3.2459	1	646	0	28202.5	64.61	37	4.3
Finca Pangola I	10.5624	-84.1235	1.963	0	339	1	35119.7	82.04	12	6.2
Finca Pangola II	10.5323	-84.1483	4.219	0	267	1	35119.7	77.97	24	4.9
Boca San Carlos	10.7887	-84.2076	2.535	1	1050	0	28202.5	96.17	9	7.2
Ochoa I	10.7803	-84.1487	3.628	1	475	0	35119.7	57.29	4	3.8
Ochoa II	10.7857	-84.1759	2.872	1	842	0	35119.7	92.68	5	3.5
Finca El Eden	10.4069	-84.1828	2.2669	0	184	1	204.849	34.43	16	5.3
No Name Finca	10.3902	-84.1667	2.1354	0	522	1	104.212	18.24	13	4.6
Querbrada Grande	10.5413	-84.2181	1.7629	0	347	1	7788.26	47.87	24	5.1
Santa Elena	10.5544	-84.3222	1.3155	0	205	1	78.057	34.96	28	5.4
Finca de Raphael Monge	10.7251	-84.172	2.941	1	699	0	35119.7	87.27	15	2.9
Finca de Chacon	10.244	-83.9942	3.0829	0	336	0	153204	90.03	5	2.6
Golfito1	10.6204	-84.084	2.2889	0	277	0	35119.7	69	30	N/A
Golfito2a	N/A	N/A	N/A	N/A	N/A	N/A	N/A	N/A	N/A	N/A
aPhotographs from Golfito2 were used in analysis from Chapter 2, but were excluded from habitat analysis in Chapter 3 and 4, due to missing data.

## Sheet: Sheet1
Tayra Occupancy
Site	1	2	3	4	5		6	7	8	9	10		11	12	13	14	15		16	17	18	19	20		21	22	23	24	25		26	27	28	29	30		31	32	33	34	35		36
Laguna	0	0	0	0	0	0	0	0	0	0	0	0	0	0	0	0	0	0	0	0	0	0	0	0	0	0	0	0	0	0	0	0	0	0	0	0	0	0	0	.	.	0	.
Pedacito	0	0	0	0	0	0	0	0	0	0	0	0	0	0	0	0	0	0	0	0	0	0	0	0	0	0	0	0	0	0	0	0	0	0	0	0	0	0	.	.	.	0	.
Maquenque	0	0	0	0	0	0	0	0	0	0	0	0	1	0	0	0	0	1	0	0	0	0	0	0	0	0	0	0	0	0	0	0	0	1	0	1	0	0	.	.	.	0	.
Pangola I	0	0	0	0	0	0	0	0	0	0	0	0	0	0	0	0	0	0	0	0	0	0	0	0	0	0	0	0	0	0	0	0	0	0	0	0	.	.	.	.	.	0	.
Pangola II	0	0	1	0	0	1	1	1	0	0	0	2	0	0	0	0	0	0	1	0	1	1	0	3	1	0	1	1	0	3	0	0	0	1	0	1	0	0	.	.	.	0	.
San Carlos	0	0	0	0	0	0	0	0	0	0	0	0	0	0	0	0	0	0	0	0	0	0	0	0	0	0	0	0	0	0	0	.	.	.	.	0	.	.	.	.	.	0	.
Ochoa I	0	0	0	0	0	0	0	0	0	0	0	0	0	0	0	0	0	0	0	0	0	0	0	0	0	0	0	0	.	0	.	.	.	.	.	0	.	.	.	.	.	0	.
Ochoa II	0	0	0	0	0	0	0	0	0	0	0	0	0	0	0	0	0	0	0	0	0	0	0	0	0	0	0	0	.	0	.	.	.	.	.	0	.	.	.	.	.	0	.
El Eden	0	0	0	0	1	1	0	0	0	1	0	1	0	0	0	0	0	0	0	0	0	0	0	0	0	0	0	0	0	0	0	0	0	0	0	0	0	0	0	0	0	0	0
No Name	0	0	0	0	0	0	0	0	0	0	0	0	0	0	0	0	0	0	0	0	0	0	0	0	0	0	0	0	0	0	0	0	0	0	0	0	0	0	0	0	0	1	1
Querbrada Grande	0	0	0	0	0	0	0	0	0	1	0	1	0	0	0	0	0	0	0	1	0	0	0	1	0	0	0	0	0	0	1	.	.	.	.	1	.	.	.	.	.	0	.
Santa Elena	0	0	0	0	0	0	1	0	1	0	0	2	0	0	1	0	0	1	0	0	0	0	0	0	0	0	0	0	0	0	0	0	0	0	.	0	.	.	.	.	.	0	.
Raphael Monge	0	0	0	0	0	0	0	0	0	0	0	0	0	0	0	0	0	0	0	0	0	0	0	0	0	0	0	0	0	0	0	0	0	0	0	0	0	0	0	0	.	0	.
Finca Chacon	0	0	0	0	0	0	0	1	0	0	0	1	0	0	0	0	0	0	0	0	0	0	0	0	0	0	0	0	0	0	0	0	0	0	0	0	0	.	.	.	.	0	.
Golfito1	0	0	0	0	0	0	0	0	0	0	0	0	0	0	0	0	0	0	0	0	0	0	0	0	0	0	0	0	0	0	0	0	0	0	0	0	0	0	0	.	.	0	.
Coati Occupancy						0						0						0						0						0						0						0
Site	1	2	3	4	5	15	6	7	8	9	10	40	11	12	13	14	15	65	16	17	18	19	20	90	21	22	23	24	25	115	26	27	28	29	30	140	31	32	33	34	35	165	36
Laguna	0	0	0	0	0	0	0	0	0	0	1	1	1	0	0	0	0	1	0	1	0	0	0	1	0	0	0	0	0	0	0	0	0	0	0	0	0	0	0	.	.	0	.
Pedacito	0	1	0	0	0	1	0	0	0	0	0	0	0	0	0	0	0	0	0	0	0	0	0	0	0	0	0	0	0	0	0	0	0	0	0	0	0	0	.	.	.	0	.
Maquenque	0	0	0	0	0	0	0	1	1	1	0	3	1	0	0	0	0	1	0	0	0	0	0	0	0	0	0	0	0	0	0	0	1	0	0	1	0	0	.	.	.	0	.
Pangola I	0	0	0	0	0	0	0	0	0	1	0	1	0	0	0	0	0	0	0	0	0	1	0	1	0	0	0	0	0	0	0	0	0	0	0	0	.	.	.	.	.	0	.
Pangola II	0	0	0	1	0	1	1	0	0	0	0	1	0	0	0	0	0	0	0	0	0	0	0	0	0	0	0	0	0	0	0	0	0	0	0	0	0	0	.	.	.	0	.
San Carlos	0	0	0	0	0	0	0	0	0	0	0	0	0	1	0	0	0	1	0	0	0	0	1	1	0	0	0	0	0	0	0	.	.	.	.	0	.	.	.	.	.	0	.
Ochoa I	0	0	0	0	0	0	0	0	0	0	0	0	0	0	0	0	0	0	0	0	0	0	0	0	0	0	0	0	.	0	.	.	.	.	.	0	.	.	.	.	.	0	.
Ochoa II	0	0	0	0	0	0	0	0	0	0	0	0	0	0	0	0	0	0	0	0	0	0	0	0	0	0	0	0	.	0	.	.	.	.	.	0	.	.	.	.	.	0	.
El Eden	0	0	1	1	0	2	1	0	0	1	0	2	0	1	0	0	1	2	1	0	0	0	0	1	1	0	0	0	1	2	0	0	0	0	1	1	0	1	0	0	0	1	0
No Name	0	0	0	0	0	0	0	0	0	0	0	0	0	0	0	0	0	0	0	0	0	0	0	0	0	0	0	0	0	0	0	0	0	0	0	0	0	0	0	0	0	0	0
Querbrada Grande	0	0	0	0	0	0	0	0	0	0	0	0	0	0	0	0	0	0	0	0	0	0	0	0	0	0	0	0	0	0	0	.	.	.	.	0	.	.	.	.	.	0	.
Santa Elena	0	0	0	1	0	1	0	0	0	0	0	0	1	0	0	0	0	1	0	0	0	0	0	0	0	1	0	0	1	2	0	0	0	0	.	0	.	.	.	.	.	0	.
Raphael Monge	0	0	0	0	0	0	1	0	0	0	0	1	0	0	0	0	0	0	0	1	0	0	0	1	0	0	0	0	0	0	0	0	0	0	0	0	0	0	0	1	.	1	.
Finca Chacon	0	0	0	0	0	0	0	0	0	0	0	0	0	0	0	0	0	0	0	0	0	0	0	0	0	0	0	0	0	0	0	0	0	0	0	0	0	.	.	.	.	0	.
Golfito1	0	0	0	0	0	0	0	0	0	0	0	0	0	0	0	0	0	0	0	0	0	0	0	0	0	0	0	0	0	0	0	0	0	0	0	0	0	0	0	.	.	0	.
Raccoon Occupancy						0						0						0						0						0						0						0
Site	1	2	3	4	5	15	6	7	8	9	10	40	11	12	13	14	15	65	16	17	18	19	20	90	21	22	23	24	25	115	26	27	28	29	30	140	31	32	33	34	35	165	36
Laguna	0	0	0	0	0	0	0	0	0	0	0	0	0	0	0	0	0	0	0	0	0	0	0	0	0	0	0	0	0	0	0	0	0	0	0	0	0	0	0	.	.	0	.
Pedacito	0	0	0	0	0	0	0	0	0	0	0	0	0	0	0	0	0	0	0	0	0	0	0	0	0	0	0	0	0	0	0	0	0	0	0	0	0	0	.	.	.	0	.
Maquenque	0	0	1	0	0	1	0	1	0	0	1	2	0	0	0	0	1	1	0	0	0	0	0	0	0	0	0	0	0	0	0	0	0	0	0	0	0	0	.	.	.	0	.
Pangola I	0	0	0	0	0	0	0	0	0	0	0	0	0	0	0	0	0	0	0	0	0	0	0	0	0	0	0	0	0	0	0	0	0	0	0	0	.	.	.	.	.	0	.
Pangola II	0	0	0	0	0	0	0	0	0	0	0	0	0	0	0	0	0	0	0	0	0	0	0	0	0	0	0	0	0	0	0	0	0	0	0	0	0	0	.	.	.	0	.
San Carlos	0	0	0	0	0	0	0	0	0	0	0	0	0	0	0	0	0	0	0	0	0	0	0	0	0	0	0	0	0	0	0	.	.	.	.	0	.	.	.	.	.	0	.
Ochoa I	0	0	0	0	0	0	0	0	0	0	0	0	0	0	0	0	0	0	0	0	0	0	0	0	0	0	0	0	.	0	.	.	.	.	.	0	.	.	.	.	.	0	.
Ochoa II	0	0	0	0	0	0	0	0	0	0	0	0	0	0	0	0	0	0	0	0	0	0	0	0	0	0	0	0	.	0	.	.	.	.	.	0	.	.	.	.	.	0	.
El Eden	0	0	0	0	0	0	0	1	0	0	0	1	0	0	0	0	0	0	0	0	0	0	0	0	0	0	0	0	0	0	0	0	0	0	0	0	0	0	0	0	0	0	0
No Name	0	0	1	0	0	1	0	0	0	0	0	0	1	0	0	0	0	1	0	0	0	0	0	0	0	0	0	0	0	0	0	0	0	0	0	0	0	0	0	0	0	0	0
Querbrada Grande	0	0	0	0	0	0	0	0	0	0	0	0	0	0	0	0	0	0	0	0	0	0	0	0	0	0	0	0	0	0	0	.	.	.	.	0	.	.	.	.	.	0	.
Santa Elena	0	0	0	0	0	0	0	0	0	0	0	0	0	0	0	0	0	0	0	0	0	0	0	0	0	0	0	0	0	0	0	0	0	0	.	0	.	.	.	.	.	0	.
Raphael Monge	0	0	0	0	0	0	0	0	0	0	0	0	0	0	0	0	0	0	0	0	0	0	0	0	0	0	0	0	0	0	0	0	0	0	0	0	0	0	0	0	.	0	.
Finca Chacon	0	0	0	0	0	0	0	0	0	0	0	0	0	0	0	0	0	0	0	0	0	0	0	0	0	0	0	0	0	0	0	0	0	0	0	0	0	.	.	.	.	0	.
Golfito1	0	0	0	0	0	0	0	0	0	0	0	0	0	0	0	0	0	0	0	0	0	0	0	0	0	0	0	0	0	0	0	0	0	0	0	0	0	0	0	.	.	0	.
Opossums						0						0						0						0						0						0						0
Site	1	2	3	4	5	15	6	7	8	9	10	40	11	12	13	14	15	65	16	17	18	19	20	90	21	22	23	24	25	115	26	27	28	29	30	140	31	32	33	34	35	165	36
Laguna	0	0	0	0	0	0	0	0	0	0	0	0	0	0	0	0	0	0	0	0	0	0	0	0	0	0	0	0	0	0	0	0	0	0	0	0	0	0	0	.	.	0	.
Pedacito	0	0	0	0	0	0	0	0	0	0	0	0	0	0	0	0	0	0	0	0	0	1	0	1	0	0	0	0	0	0	0	0	0	0	0	0	0	0	.	.	.	0	.
Maquenque	0	0	0	0	0	0	0	0	0	0	0	0	0	1	0	0	0	1	0	0	0	0	1	1	0	1	0	0	0	1	0	0	0	0	0	0	0	0	.	.	.	0	.
Pangola I	0	0	1	0	0	1	0	0	0	0	0	0	0	0	0	0	0	0	0	1	0	0	0	1	0	0	0	0	0	0	0	0	0	0	0	0	.	.	.	.	.	0	.
Pangola II	0	0	0	0	0	0	0	0	0	0	0	0	0	0	0	0	0	0	0	0	0	0	0	0	0	0	0	0	0	0	0	0	0	0	0	0	0	0	.	.	.	0	.
San Carlos	0	0	0	0	0	0	0	0	0	0	0	0	0	0	0	0	0	0	0	0	0	0	0	0	0	0	0	0	0	0	0	.	.	.	.	0	.	.	.	.	.	0	.
Ochoa I	0	1	0	0	0	1	0	0	0	0	0	0	0	0	0	0	0	0	0	0	1	0	0	1	0	0	0	0	.	0	.	.	.	.	.	0	.	.	.	.	.	0	.
Ochoa II	1	1	0	0	1	3	0	1	0	0	1	2	0	0	0	1	0	1	0	1	0	0	0	1	1	0	0	0	.	1	.	.	.	.	.	0	.	.	.	.	.	0	.
El Eden	0	0	0	0	0	0	0	0	0	0	0	0	0	0	0	0	0	0	0	0	0	0	0	0	0	0	0	0	0	0	0	0	0	0	0	0	0	0	0	0	0	0	0
No Name	0	0	0	0	0	0	0	0	0	0	0	0	0	0	0	0	0	0	1	0	0	0	0	1	0	0	0	1	0	1	0	0	0	0	0	0	0	0	0	0	0	0	0
Querbrada Grande	1	0	1	0	0	2	1	0	0	0	0	1	0	0	0	1	0	1	0	0	0	0	0	0	0	0	0	0	0	0	0	.	.	.	.	0	.	.	.	.	.	0	.
Santa Elena	0	0	0	0	0	0	0	0	0	0	0	0	0	0	0	0	0	0	0	0	0	0	0	0	0	0	0	0	0	0	0	0	0	0	.	0	.	.	.	.	.	0	.
Raphael Monge	0	0	0	0	0	0	0	0	0	0	0	0	0	0	0	0	0	0	0	0	0	0	0	0	0	0	0	0	0	0	0	0	0	0	0	0	0	0	0	0	.	0	.
Finca Chacon	0	0	0	0	0	0	0	0	0	0	0	0	0	0	0	0	0	0	0	0	0	0	0	0	0	0	1	0	0	1	0	0	0	0	0	0	0	.	.	.	.	0	.
Golfito1	0	0	0	0	0	0	0	0	0	0	0	0	0	0	0	0	0	0	0	0	0	0	0	0	0	0	0	0	0	0	0	0	0	0	0	0	0	0	0	.	.	0	.
